# Supplementary material for: Revealing the structure–activity relationship in woven covalent organic frameworks for the electrocatalytic oxygen reduction reaction
Source: Royal Society of Chemistry journal article supplement (doi:10.1039/d2nr00791f), 2022-01-01
Supplement: d2nr00791f1.pdf [file d2nr00791f1.pdf]

Supporting Information

## Revealing the Structure-Activity Relationship in Woven Covalent Organic Frameworks for Electrocatalytic Oxygen Reduction Reaction

Jiawen Li, Peng Liu, Jianxin Mao, Jianyue Yan, and Wenbo Song\*

College of Chemistry, Jilin University, Changchun 130012, P.R. China.

\*E-mail: [wbsong@jlu.edu.cn](mailto:wbsong@jlu.edu.cn)

### Contents

|                                          |    |
|------------------------------------------|----|
| 1. Lattice parameters .....              | 1  |
| 3. XPS spectra.....                      | 3  |
| 4. Electrocatalytic Analysis .....       | 4  |
| 5. Theoretical Computation Section ..... | 7  |
| 6. Linkage Conversion Section .....      | 8  |
| 7. Comparison Table.....                 | 10 |

### 1. Lattice parameters

**Table S1.** Pawley-refined lattice parameters of COF-112

| Lattice parameters | COF-112Co | COF-112Fe |
|--------------------|-----------|-----------|
| a (Å)              | 19.7833   | 19.8969   |
| b (Å)              | 25.1229   | 23.4190   |
| c (Å)              | 11.8086   | 12.8494   |
| $\alpha$ (°)       | 90        | 90        |
| $\beta$ (°)        | 90        | 90        |
| $\gamma$ (°)       | 90        | 90        |

## **2. TEM images**

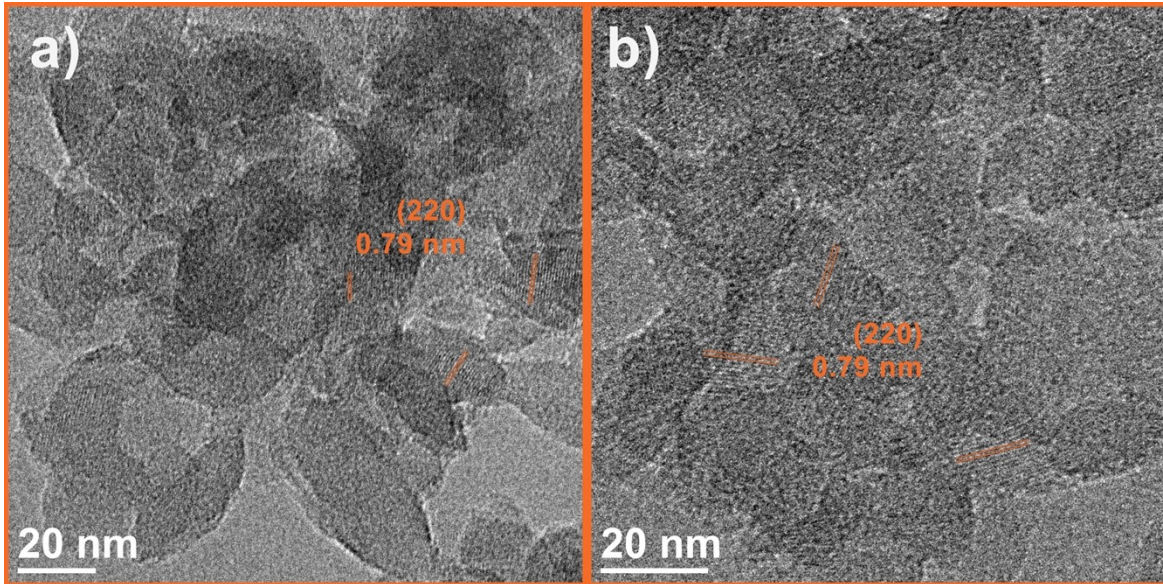

**Figure S1.** TEM images of COF-112Co (a, b).

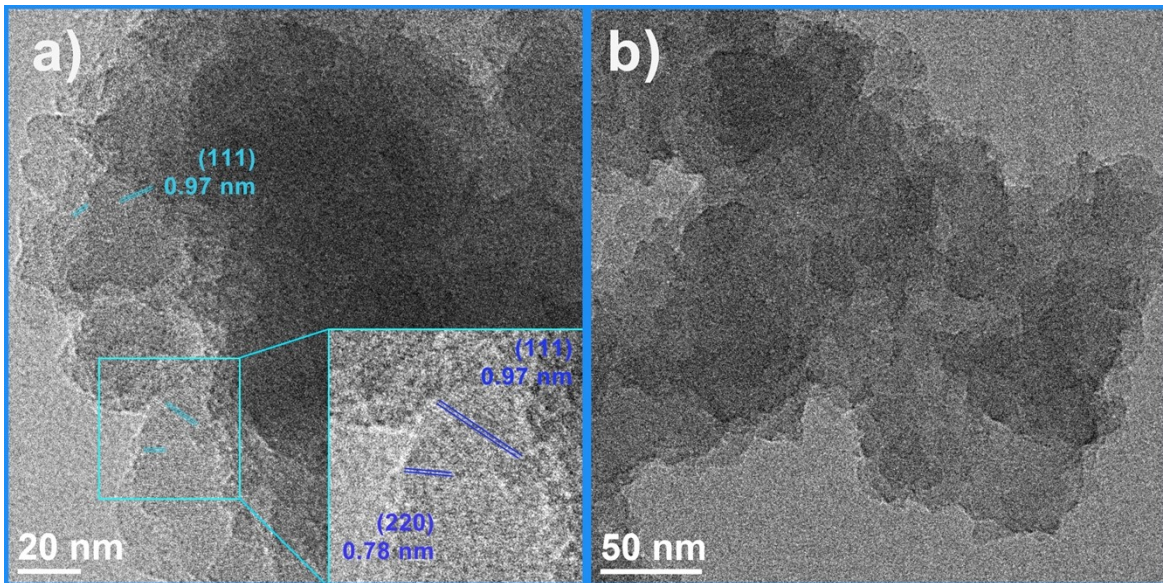

**Figure S2.** TEM images of COF-112Fe (a, b).

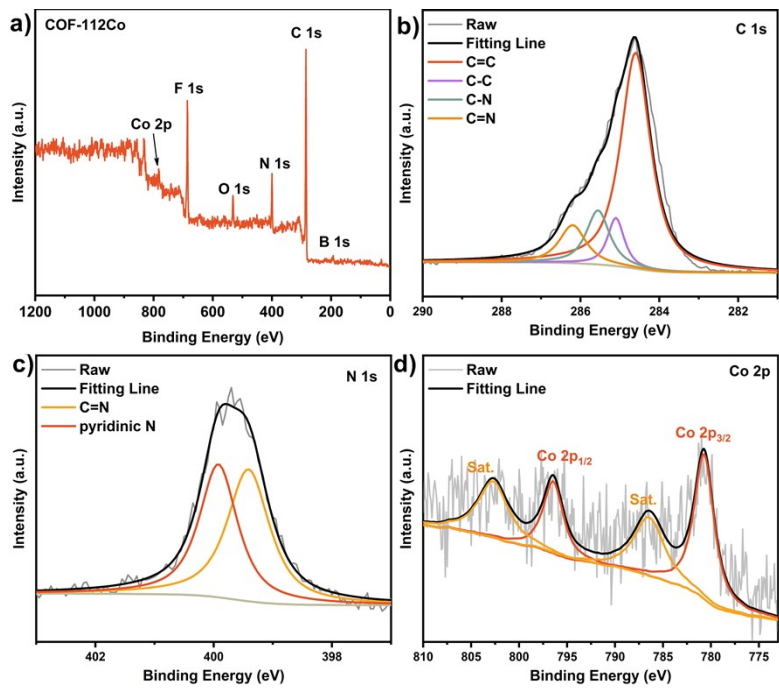

Figure S3. XPS spectra of COF-112Co: a) survey, b) C 1s, c) N 1s, d) Co 2p.

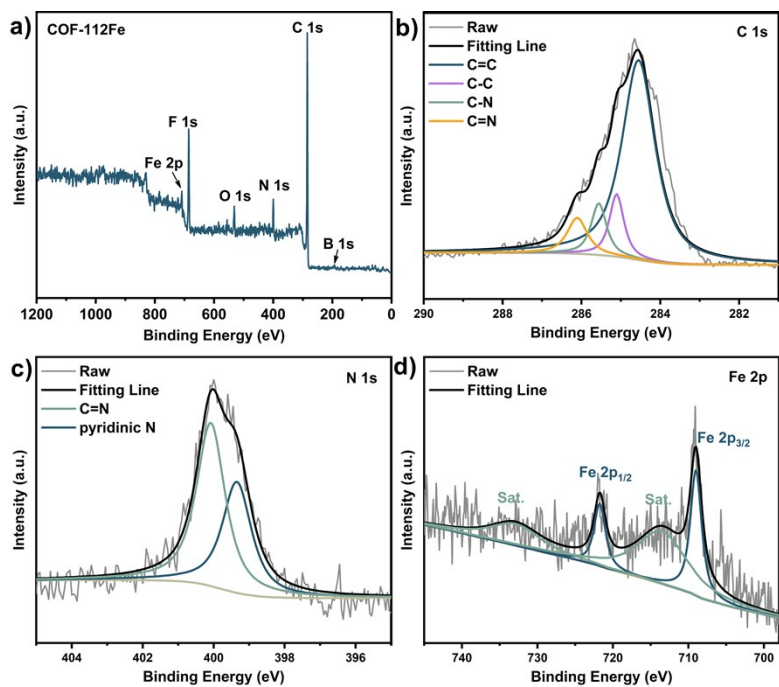

Figure S4. XPS spectra of COF-112Fe: a) survey, b) C 1s, c) N 1s, d) Fe 2p.

### 3. XPS spectra





**Table S2.** Element content analysis calculated from XPS.

| COFs      | Co (at%) | Fe (at%) | B (at%) | C (at%) | N (at%) | F (at%) |
|-----------|----------|----------|---------|---------|---------|---------|
| COF-112Co | 1.73     | -        | 7.89    | 66.83   | 10.13   | 13.42   |
| COF-112Fe | -        | 3.30     | 5.91    | 70.94   | 8.80    | 11.06   |

#### 4. Electrocatalytic Analysis

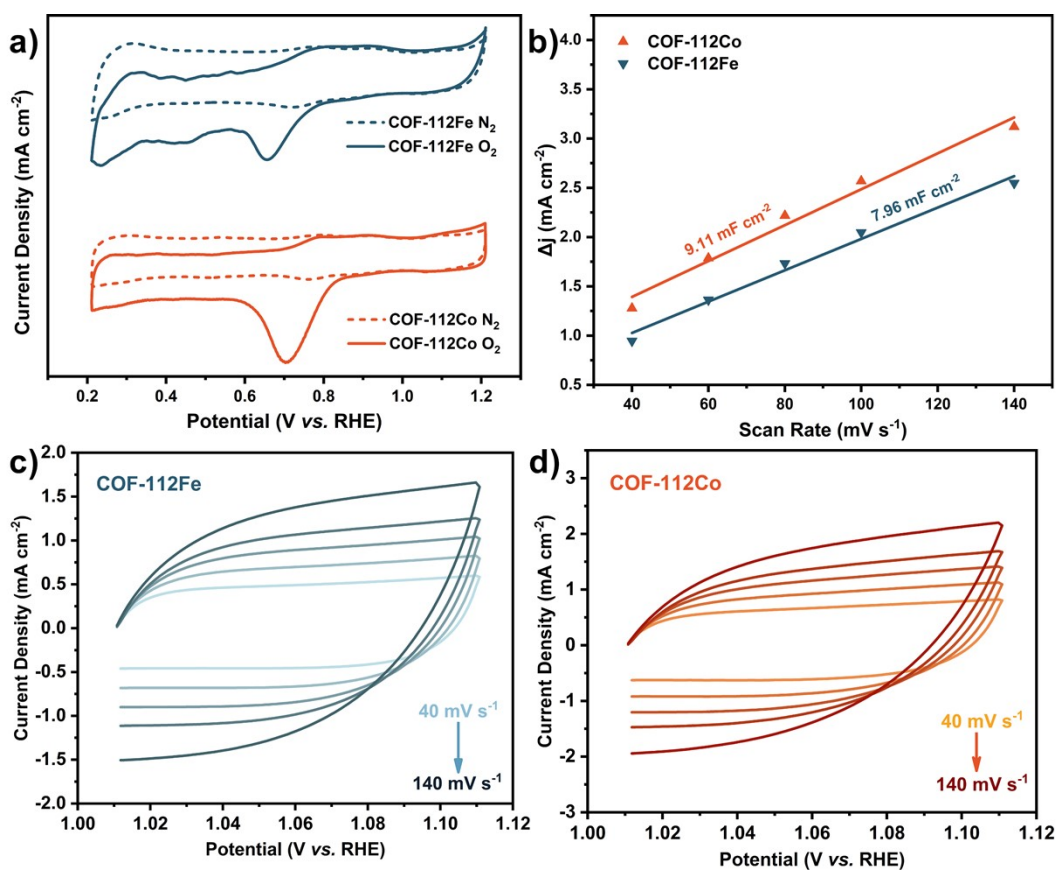

**Figure S5.** (a) CVs curves of COF-112Co and COF-112Fe in O<sub>2</sub> (solid line) or N<sub>2</sub> (dashed line) -saturated 0.1M KOH. (b) Scan rate dependent-current densities at 1.06 V vs. RHE. CVs in non-faradaic region of COF-112Fe (c) and COF-112Co (d).

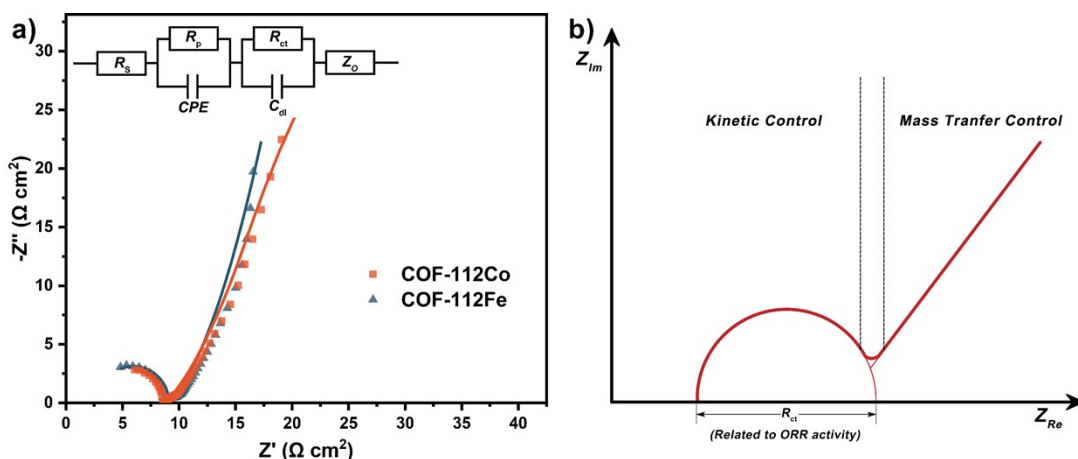

**Figure S6.** (a) Nyquist plots for **COF-112Co** and **COF-112Fe**, (b) The relation between ORR process and EIS.

In the Nyquist plots, the charge-transfer resistance ( $R_{ct}$ ) is the main parameter that reflects the ORR activity. In contrast, the linear part of EIS spectra is controlled by diffusion (mass transfer), which is not the main parameter that influences the ORR intrinsic activity (Figure S6b). The  $R_{ct}$  of COF-112Co ( $5.50 \Omega \text{ cm}^2$ ) is smaller than that of COF-112Fe ( $6.26 \Omega \text{ cm}^2$ ), indicating the faster ORR kinetics of COF-112Co.

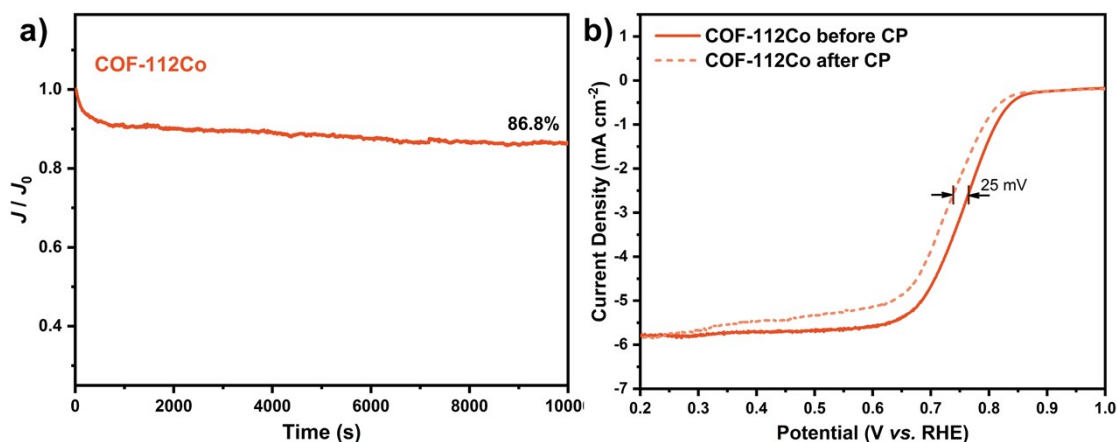

**Figure S7.** (a) Chronoamperometry test at 0.6 V vs. RHE of **COF-112Co**, (b) LSV plots (at 1600 rpm) of **COF-112Co** before and after chronoamperometry.

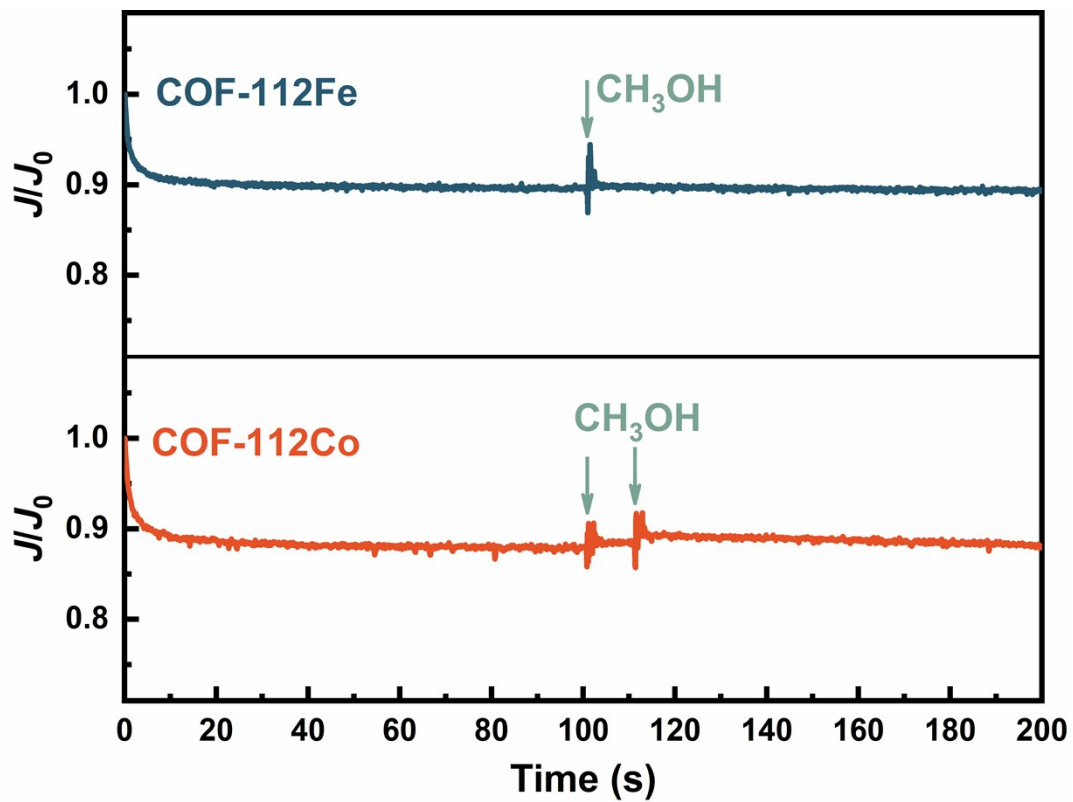

Figure S8. Methanol crossover tests of COF-112Co and COF-112Fe.

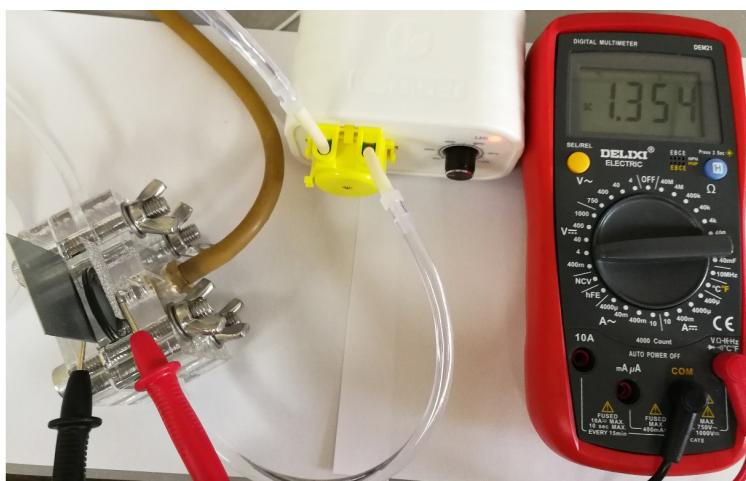

Figure S9. Open-circuit voltage of the Zn-air battery of COF-112Co.



## 5. Theoretical Computation Section

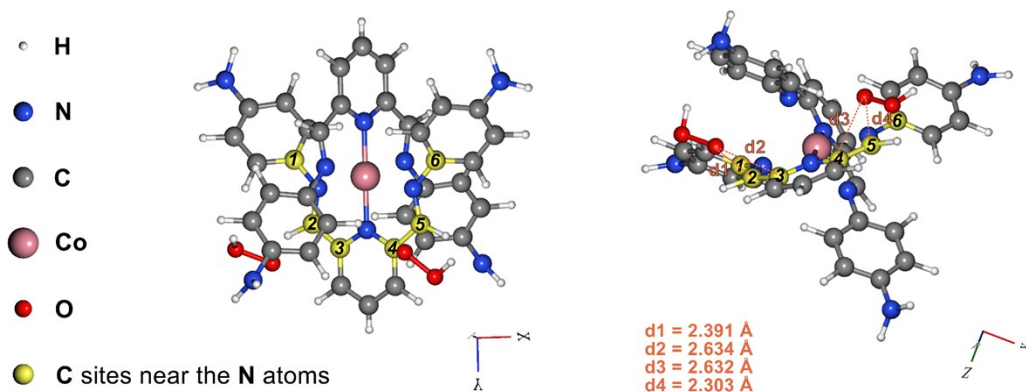

**Figure S10.** DFT calculation model of COF-112Co.

**Table S3.** DFT adsorption free energies of the ORR intermediates ( $^*O_2$ ,  $^*OOH$ ,  $^*O$ , and  $^*OH$ ) for the calculation model of COF-112. ORR limiting potentials and the rate-determine step (RDS) are displayed for each row.

| Central Metal | Binding Site | $\Delta G^*OO$ (eV) | $\Delta G^*OOH$ (eV) | $\Delta G^*O$ (eV) | $\Delta G^*OH$ (eV) | Limiting Barrier (eV) | Rate-determine Step       |
|---------------|--------------|---------------------|----------------------|--------------------|---------------------|-----------------------|---------------------------|
| Co            | C2&C3        | 4.561               | 4.325                | 3.103              | 1.343               | 0.994                 | $^*O_2 \rightarrow ^*OOH$ |
| Co            | C4&C5        | 4.599               | 4.274                | 2.984              | 1.177               | 0.904                 | $^*O_2 \rightarrow ^*OOH$ |
| Fe            | C4&C5        | 4.550               | 4.247                | 3.002              | 1.143               | 0.927                 | $^*O_2 \rightarrow ^*OOH$ |

## 6. Linkage Conversion Section

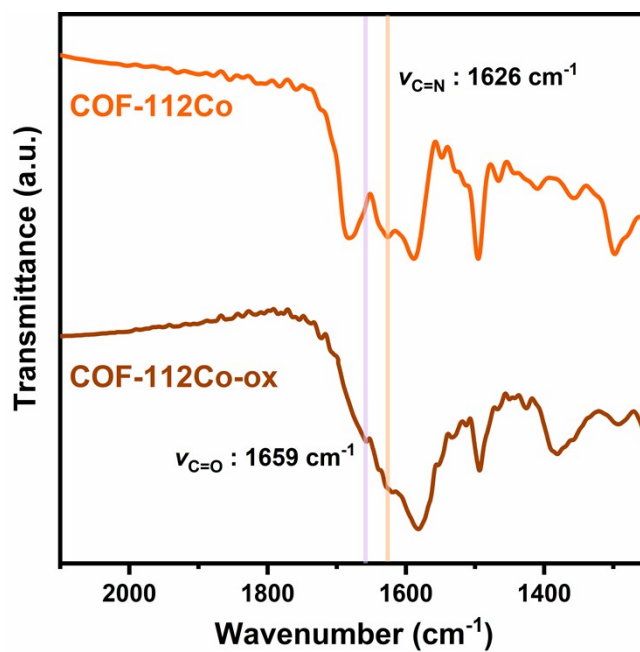

Figure S11. FT-IR spectra of COF-112Co and COF-112Co-ox.

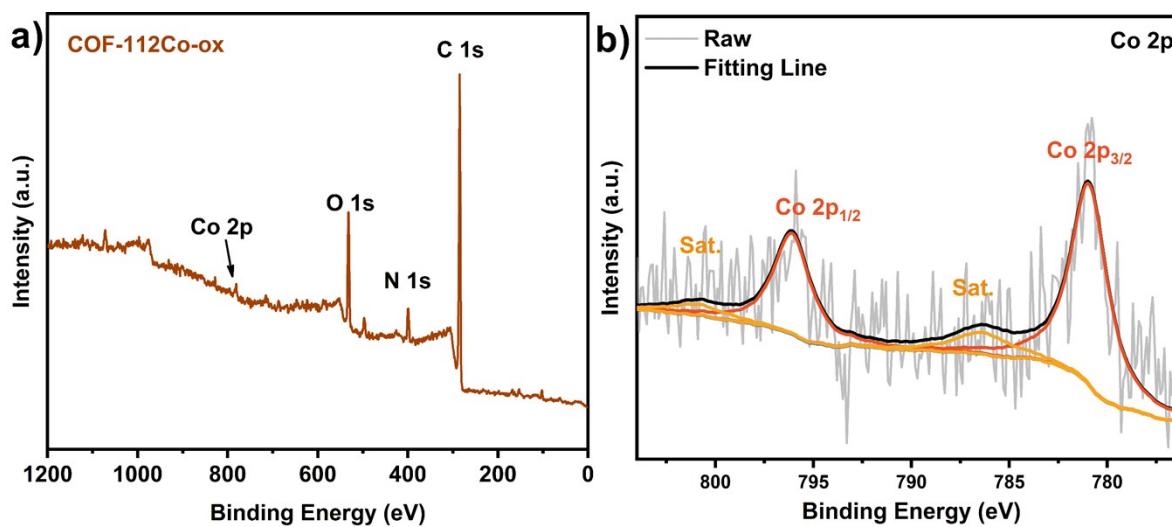

Figure S12. XPS spectra of COF-112Co-ox: a) survey, b) Co 2p.

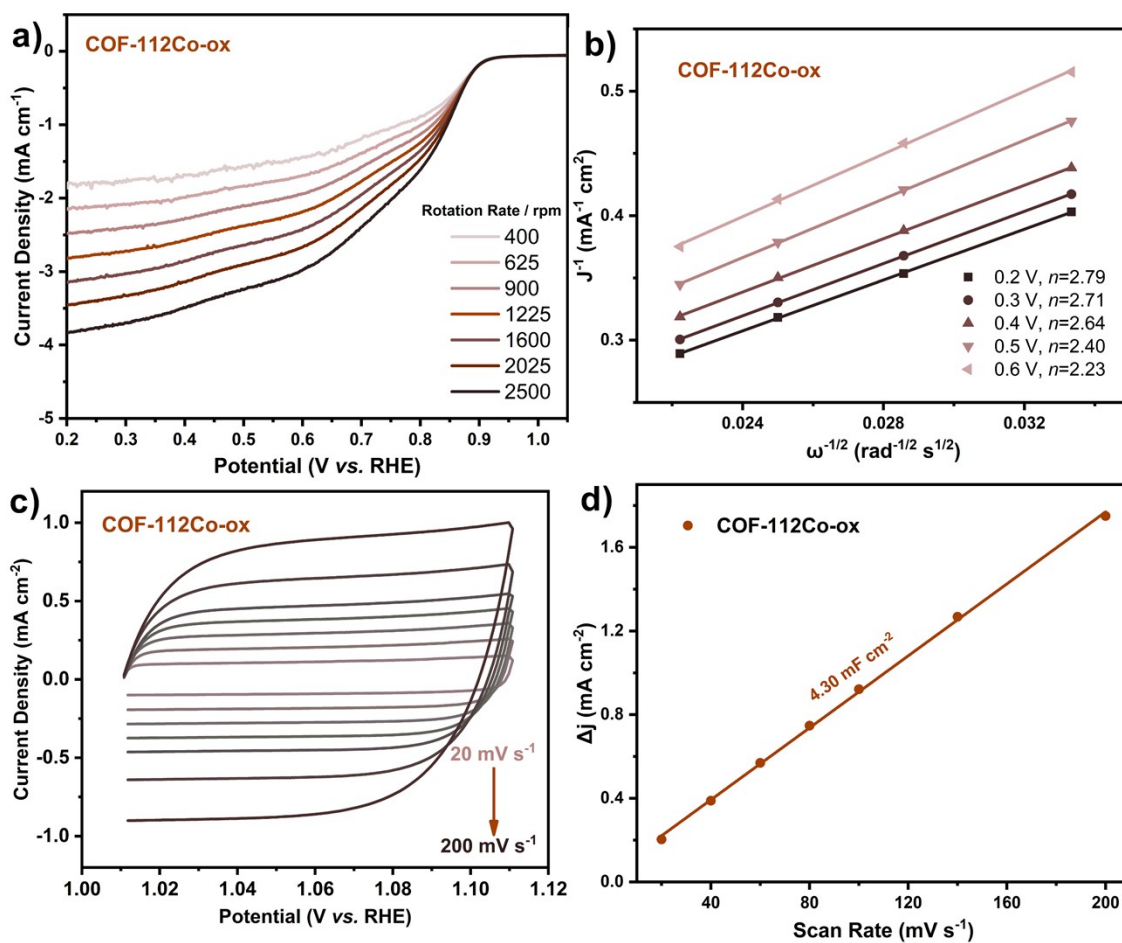

**Figure S13.** a) RDE plots, b) K-L plots, c) CV curves in non-faradic region, and d) Scan rate dependent-current densities at 1.06 V vs. RHE. of COF-112Co-ox.

The electron transfer numbers calculated from RDE measurements are 2.23~2.64 (0.6V~0.4 V vs. RHE), similar to the results of RRDE.

## 7. Comparison Table

**Table S4.** Comparisons of the ORR activity of pristine POP catalysts.

| Catalyst           | Electrolyte     | Half-wave Potential (V vs. RHE) | Current Density (mA cm <sup>-2</sup> ) @E (V vs. RHE) | Electron transfer number @E (V vs. RHE) | Rotate speed (rpm) | Ref.             |
|--------------------|-----------------|---------------------------------|-------------------------------------------------------|-----------------------------------------|--------------------|------------------|
| <b>COF-112Co</b>   | <b>0.1M KOH</b> | <b>0.76</b>                     | <b>5.78@0.2</b>                                       | <b>3.86@0.2</b>                         | <b>1600</b>        | <b>This work</b> |
| NDI-CON            | 0.1M NaOH       | ~0.68                           | ~3.72@0.3                                             | 3.6                                     | 1500               | 1                |
| Co@TPA-PDI         | 0.1M KOH        | ~0.71                           | 5.7@0.3                                               | 3.9                                     | 1600               | 2                |
| PTM-CORF           | 0.1M KOH        | ~0.69                           | ~5.7@0.17                                             | 3.89@0.6                                | 1600               | 3                |
| COF <sub>BTC</sub> | 0.1M KOH        | 0.91                            | ~5.3@0.2                                              | 3.95@0.85                               | 1600               | 4                |
| CoCOF-Py-rGO       | 0.1M KOH        | 0.76                            | 4.72@0.2                                              | 3.7@0.2                                 | 1600               | 5                |
| COP/rGO            | 0.1M KOH        | ~0.72                           | ~4.31@0.2                                             | 3.7@0.75                                | 1600               | 6                |
| TAPA-PG            | 0.1M KOH        | ~0.57                           | ~4.16@0.2                                             | 3.84@0.3                                | 1600               | 7                |
| Co@TAPA-PG         | 0.1M KOH        | ~0.63                           | ~4.8@0.2                                              | 3.63                                    | 1600               | 7                |
| JUC-528            | 0.1M KOH        | 0.70                            | ~5.0@0.2                                              | 3.81@0.2                                | 1600               | 8                |
| G@POF-Co           | 0.1M KOH        | 0.81                            | ~5.43@0.2                                             | 3.8                                     | 1600               | 9                |

All of these parameters with “~” are obtained by the graph of LSV curves at 1600 rpm.

## References:

1. S. Royuela, E. Martinez-Perinan, M. P. Arrieta, J. I. Martinez, M. M. Ramos, F. Zamora, E. Lorenzo and J. L. Segura, *Chem. Commun.*, 2020, **56**, 1267-1270.
2. S. Bhattacharyya, D. Samanta, S. Roy, V. P. Haveri Radhakantha and T. K. Maji, *ACS Appl. Mater. Interfaces*, 2019, **11**, 5455-5461.
3. S. Wu, M. Li, H. Phan, D. Wang, T. S. Herng, J. Ding, Z. Lu and J. Wu, *Angew. Chem. Int. Ed.*, 2018, **57**, 8007-8011.
4. P. Peng, L. Shi, F. Huo, C. Mi, X. Wu, S. Zhang and Z. Xiang, *Sci. Adv.*, 2019, **5**, eaaw2322.
5. Q. Zuo, G. Cheng and W. Luo, *Dalton Trans.*, 2017, **46**, 9344-9348.
6. J. Guo, C. Y. Lin, Z. Xia and Z. Xiang, *Angew. Chem. Int. Ed.*, 2018, **57**, 12567-12572.
7. A. Singh, D. Samanta and T. K. Maji, *ChemElectroChem*, 2019, **6**, 3756-3763.
8. D. Li, C. Li, L. Zhang, H. Li, L. Zhu, D. Yang, Q. Fang, S. Qiu and X. Yao, *J. Am. Chem. Soc.*, 2020, **142**, 8104-8108.
9. B. Q. Li, S. Y. Zhang, X. Chen, C. Y. Chen, Z. J. Xia and Q. Zhang, *Adv. Funct. Mater.*, 2019, **29**, 1901301.
